# Supplementary figures and images for: The Gluopsins: Opsins without the Retinal Binding Lysine
Source: MDPI journal article supplement (doi:10.3390/cells11152441), 2022-08-06

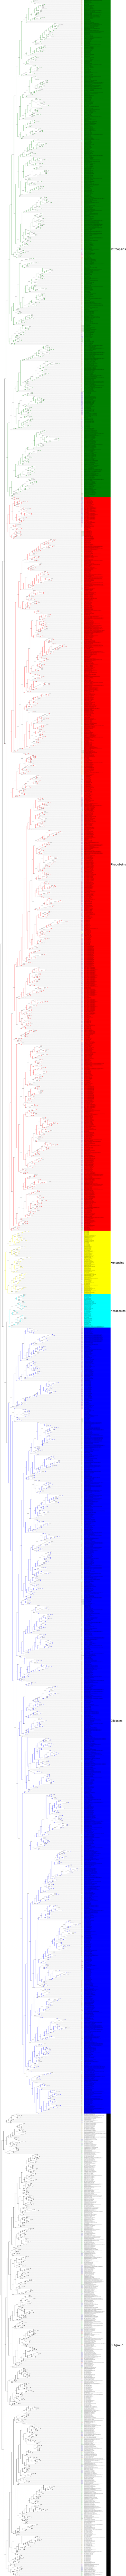

Supplement: s1 [file s1]

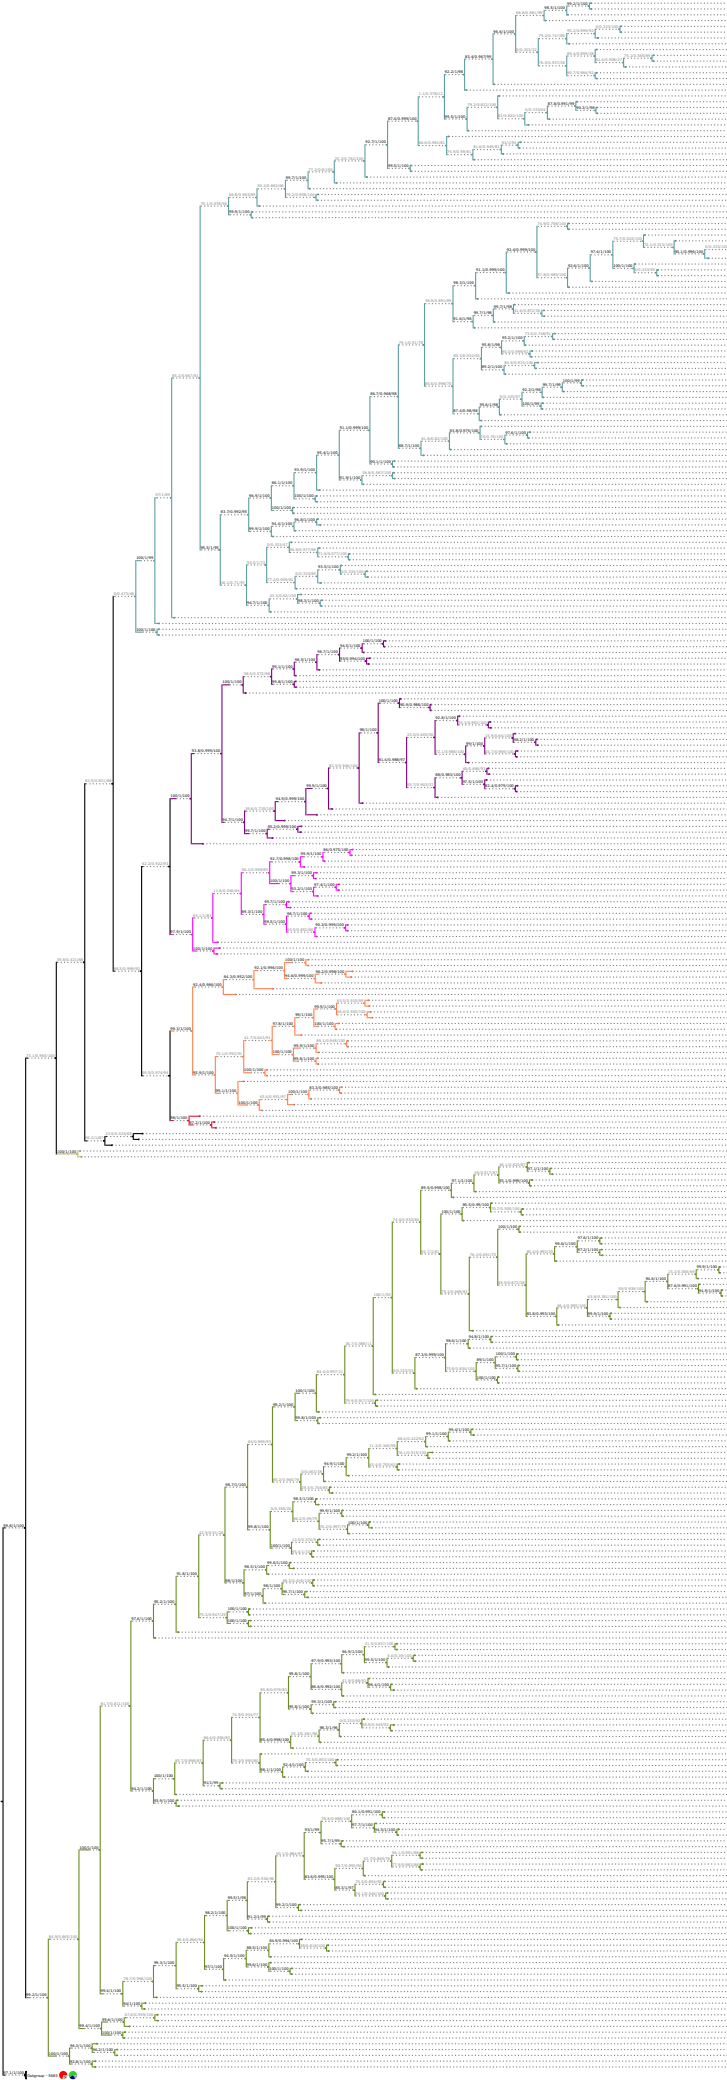

## Peropsins

## Gluopsins

## Varropsins

## Retinochromes

## Astropsins Nemopsins

## RGR-opsins

Supplement: s1 [file s1]
